# Supplementary material for: HÄPPI – Konzeption eines Modells für die ambulante Versorgung in Deutschland
Source: Springer Nature journal article supplement (doi:10.1007/s44266-023-00161-w), 2024-01-26

# **HÄPPI**

## **(Hausärztliches Primärversorgungszentrum – Patientenversorgung Interprofessionell)**

ein Konzept des Hausärzteverbandes Baden-Württemberg

## **Hintergrund und zukünftige Herausforderungen:**

In einer alternden Gesellschaft führt die damit zunehmende Krankheitslast zu einem höherem Versorgungsbedarf. Der demographische Alterungsprozess wird erheblichen Einfluss auf die Sicherstellung und Finanzierung der medizinischen Versorgung in Deutschland haben<sup>1</sup>

Bereits 2008 forderte die WHO die Staaten auf, die Orientierung ihrer Gesundheitssysteme stärker auf die gesundheitliche Primärversorgung auszurichten. Ohne eine grundlegende Neuorientierung sei es wahrscheinlich, dass die Gesundheitssysteme durch die zunehmenden Herausforderungen alternder Bevölkerungen, durch die starke Zunahme chronischer Erkrankungen, durch neu auftretende Erkrankungen und durch die Auswirkungen des Klimawandels überfordert würden.

Die Stärkung der primären Gesundheitsversorgung (Primary Health Care, PHC) stellt den inklusivsten, effektivsten und effizientesten Ansatz dar, die physische und psychische Gesundheit und das soziale Wohlergehen der Menschen zu verbessern. Fortgeschrittene Gesundheitssysteme ermöglichen einen niederschweligen und gerechten Zugang zum Gesundheitswesen. Die gesundheitliche Primärversorgung ist ein Eckpfeiler nachhaltiger Gesundheitssysteme für eine flächendeckende Gesundheitsversorgung und für das Erreichen der gesundheitsbezogenen Nachhaltigkeitsziele<sup>2</sup>.

Neben der Zunahme der Krankheitslast steht Deutschland vor der Herausforderung der stetig abnehmenden Anzahl an Ärzt:innen, die sich als Hausärzt:innen niederlassen. Im Jahr 2035 werden bundesweit etwa 11.000 Hausärzt:innen fehlen<sup>3</sup>. Die Schaffung isolierter Anlaufstellen wie Gesundheitskioske oder Ansätze, die die zentral koordinierende und steuernde Funktion von Hausärzt:innen nicht berücksichtigen, führen nach Ansicht des Hausärztinnen- und Hausärzteverbandes nicht zu einer verbesserten Versorgungsqualität, sondern lediglich zu einer erneuten Schnittstelle, die eine koordinierte Steuerung erschweren, mit nicht vorhandenen Ressourcen planen und kostenintensiv sind. Angesichts zunehmender psychischer (Ko-)Morbiditäten, Multimorbidität und sozialmedizinischer Fragestellungen, gewinnt die langfristige, anlassübergreifende Betreuung noch mehr an Bedeutung. Der Sachverständigenrat zur Beurteilung der Entwicklung im Gesundheitswesen beschreibt ein Nebeneinander von Fehl-, Über- und Unterversorgung im deutschen Gesundheitssystem und empfiehlt ein höheres Maß an Steuerung.<sup>3</sup> Versorgungsdaten der hausarztzentrierten Versorgung als freiwilliges primärärztliches Modell zeigen ein langfristig bessere Versorgung chronischer kranker Patient:innen.<sup>4</sup> Ein höheres Maß an Steuerung und Koordination ist wünschenswert

Auch andere Megatrends wie die Ambulantisierung und Work-Life-Balance bieten Chancen für neue Arbeitsmodelle und Konzepte. Zudem steigt laut KBV der Anteil der Angestellten wie auch in Teilzeit tätigen Ärzt:innen in Deutschland<sup>5</sup>. In der Regel verfügen insbesondere größere Praxiseinheiten über

---

<sup>1</sup> SVR 2018

<sup>2</sup> WHO 2019

<sup>3</sup> Bosch Stiftung 2021

<sup>4</sup> Evaluationsdaten der Hausarztzentrierten Versorgung 2011-2020 (2023)

<sup>5</sup> KBV 2022

mehr finanzielle Mittel und personelle Ressourcen, um Veränderungen und Anpassungen in ihrer Arbeitsstruktur umzusetzen. Dies ermöglicht es ihnen, flexiblere Arbeitsmodelle wie Teilzeitarbeit oder Anstellungsmöglichkeiten besser zu integrieren.

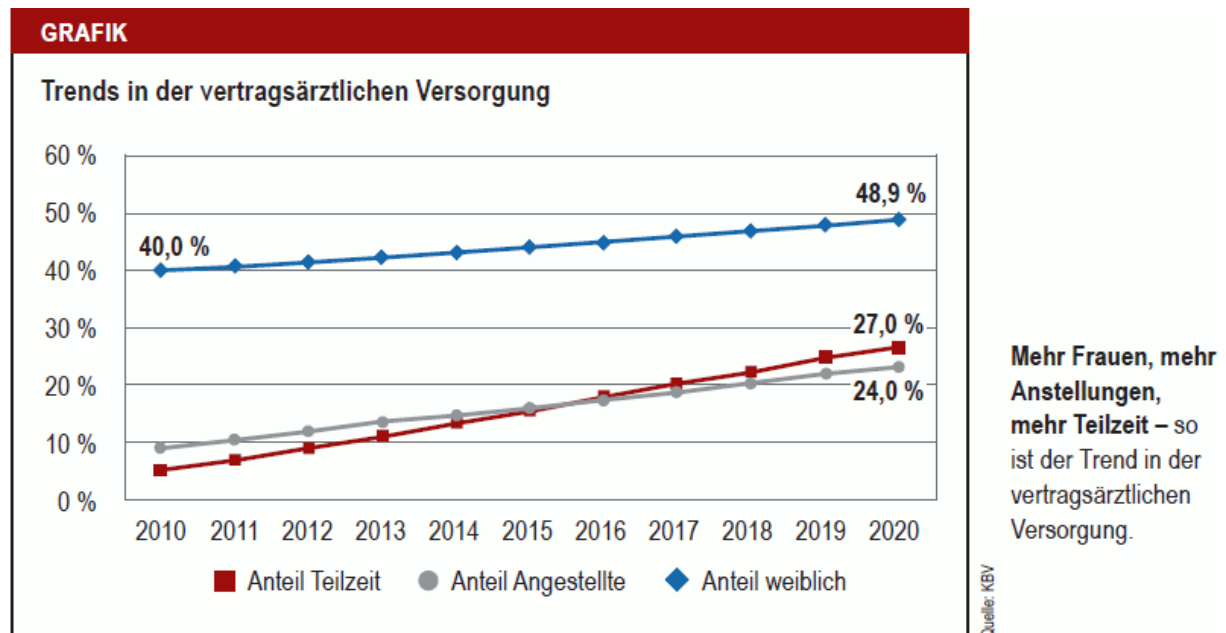

<sup>6</sup> Quelle: Daten der KBV 2022

Hausärztliche Praxen und ihre Praxisteams sind erste Anlaufstellen im deutschen Gesundheitssystem, sie ermöglichen eine niederschwellige, flächendeckende, kosteneffektive und sozial gerechte Gesundheitsversorgung. Die Stärkung der hausärztlichen Versorgung muss im Mittelpunkt von Änderungen im Gesundheitssystem stehen, denn Patient:innen wünschen eine wohnortnahe Versorgung aus einer Hand und bringen Hausärzt:innen ein sehr hohes Maß an Vertrauen entgegen. Der überwiegende Anteil aller Anliegen und Beratungsanlässe kann von Hausärzt:innen bei hoher Patientenzufriedenheit zeitnah gelöst werden<sup>7</sup>. Dies wurde auch unter Extrembedingungen während der Corona-Pandemie sichtbar, in der über 95% der Patient:innen ausschließlich und abschließend in der hausärztlichen Versorgung behandelt wurden.

Internationale Studien zeigen, dass die Einbindung weiterer Gesundheitsberufe in die hausärztliche Versorgung im Sinne einer interprofessionellen Primärversorgung ein vielversprechender Ansatz ist.<sup>5</sup> Multiprofessionelle und interdisziplinäre Kooperationen sollen auch nach Sicht des Sachverständigenrat zur Beurteilung der Entwicklung im Gesundheitswesen ausgebaut werden<sup>8</sup>. Eine bedarfsgerechte Versorgung ist auf neue, den veränderten Anforderungen und Aufgaben entsprechende Formen der Kooperation und auf eine multi-professionelle Sichtweise angewiesen.<sup>9</sup>

Vor diesem Hintergrund muss aus Sicht des Hausärztinnen- und Hausärzteverbandes die Versorgung mithilfe von zukunftsfähigen Versorgungskonzepten weiterentwickelt und teils neu gedacht werden. Mit dem HÄPPI wird ein zukunftsorientiertes Modell für die interprofessionelle Primärversorgung in Deutschland vorgelegt, dass unter Berücksichtigung der bestehenden Versorgungssituation machbar ist.

<sup>6</sup> Dtsch Arztebl 2021

<sup>7</sup>Contandriopoulos et al 2018

<sup>8</sup> SVR 2009 und 2018

<sup>9</sup> SVR 2014

# Präambel

HÄPPI ist ein zukunftsorientiertes, berufsübergreifendes Versorgungsangebot, das sich durch die kontinuierliche, kooperative und versorgungssteuernde hausärztliche Koordination der umfassenden Grundversorgung auszeichnet.

Das HÄPPI ist demnach ein von Hausärztinnen und Hausärzten gegründetes Zentrum bzw. Netzwerk, das darauf ausgerichtet ist, den aktuellen und zukünftigen Bedürfnissen der Patient:innen wie auch der Hausärzt:innen gerecht zu werden und sich den wandelnden Anforderungen im Gesundheitswesen anzupassen. Hierbei werden innovative digitale Anwendungen zur Bewältigung der hausärztlichen Aufgaben eingebunden und die Patientenversorgung über hybride Versorgungsangebote gewährleistet. HÄPPI bildet eine teamorientierte Hausarztpraxis mit interprofessioneller Ausrichtung ab in dem eine klare Rollenverteilung und Verantwortlichkeit innerhalb des hausärztlichen Teams anhand der Mitarbeiterqualifikationen wie auch verbindliche Kooperationen mit weiteren Akteuren im Gesundheitswesen adressiert werden. Durch die Möglichkeit, das Versorgungskonzept HÄPPI auf bereits existierende Strukturen und Verträge aufzusetzen, wird einer Versorgungszersplitterung entgegengewirkt. HÄPPI stellt sich damit als ein integratives und flexibel auszugestaltendes Versorgungskonzept dar, das regionalen Bedarfe abbilden soll.

## Ziele des HÄPPI

Das HÄPPI hat insbesondere zum Ziel:

- Interprofessionelle Versorgung in der Teampraxis fördern
- Patientenzentrierung
- Steuerung durch Gatekeeping und Vernetzung im Gesundheitswesen
- Digitale Konzepte und hybride Versorgung stärken
- Gesundheitskompetenz stärken
- Ambulantisierung befördern (HÄPPI-Plus)

### Interprofessionelle Versorgung in der Teampraxis fördern

Interprofessionalität im ambulanten Gesundheitswesen bedeutet eine enge Zusammenarbeit und Koordination von Fachkräften aus verschiedenen Gesundheitsberufen, wie Haus- und Facharztbereich, Pflege, Therapieberufe oder auch Soziale Arbeit. Hierdurch soll eine umfassende Versorgung und Betreuung der Patienten sichergestellt werden. Mittels interprofessioneller Teampraxisstrukturen in der hausärztlichen Versorgung durch Einbindung akademischer, nicht-ärztlicher Gesundheitsberufe wie der akademisierten VERAH oder dem Physician Assistant wird eine umfassendere und koordinierte Betreuung für Patient:innen erreicht. Grundlegend dafür ist der Wissens- und Erfahrungsaustausch zwischen den HÄPPI-Teammitgliedern. Fachkenntnisse und Ressourcen können gebündelt werden, um die Effizienz, Qualität und Sicherheit der Versorgung zu verbessern.

### Patientenzentrierung

Im HÄPPI werden Patient:innen über Patient-Reported-Outcomes (PROs) eine Rückmeldung geben, welche Therapieeffekte mittel- und langfristig eingetreten sind. Durch die Berücksichtigung der

Patientenperspektive, wird Wirksamkeit von Therapien aus Sicht der Patienten bewertet und Nebenwirkungen oder Probleme möglichst frühzeitig aufgedeckt.

#### Steuerung durch Gatekeeping und Vernetzung im Gesundheitswesen

HÄPPI steuert Patientenströme sinnvoll durch Wahrnehmung einer Gatekeeper-Funktion und bietet Schutz vor Über-, Unter- und Fehlversorgung. Im Versorgungsmodell der Hauszentrierten Versorgung nach §73b SGB V wird bereits die Gatekeeper-Funktion durch die Hausarztpraxis erfüllt und deren Wirksamkeit durch verschiedene Evaluationen bewiesen, aufgrund dessen nutzt das HÄPPI die vorbestehenden HZV-Strukturen<sup>10 11</sup>. Durch effiziente Steuerung wird eine zeitnahe, niederschwellige und wohnortnahe Gesundheitsversorgung für alle ermöglicht. Es findet eine enge Vernetzung mit den an der fachärztlichen Versorgung teilnehmenden Ärzt:innen sowie weiteren Strukturelementen des Gesundheitssektor wie Kommunen, Gesundheitskiosken, Apotheken, Therapieberufen, Fachärzt:innen (z. B. Psychiater:innen), Sozialarbeiter:innen statt.

#### Digitale Konzepte und hybride Versorgung stärken

Im HÄPPI werden digitale Versorgungsansätze und analoge Vorortleistungen verzahnt. Behandlungsteams könnten entlastet, die Qualität der medizinischen Betreuung verbessert und der Zugang zu medizinischer Expertise erweitert (wie z. B. über Videokonsultation oder Videokonsile) werden. Dies ermöglicht den Patienten eine flexiblere und komfortablere Art der Gesundheitsversorgung und erweitert die Möglichkeiten zur Interaktion zwischen Patienten und HÄPPI-Teams.

Digitale Tools können bereits jetzt nahtlos in den Praxisalltag integriert werden. So bieten Triage-Tools die Möglichkeit, den Schweregrad der Symptome eines Patienten zu bewerten und die Dringlichkeit der Versorgung einzuschätzen, wodurch eine automatisierte Vorsortierung erfolgt und die Zuweisung in die richtige Versorgungsebene unterstützt wird. Durch die Strukturierung wird die zunehmende Arbeitsbelastung beherrschbarer.

In der Nutzung der zur Verfügung stehenden digitalen Anwendungen liegt bisher ungenutztes Innovationspotenzial, die es gilt im HÄPPI zu erschließen.

#### Gesundheitskompetenz stärken

Die Stärkung der Gesundheitskompetenz der in Deutschland lebenden Bevölkerung ist von entscheidender Bedeutung, da dies positive Auswirkungen auf die Gesundheit der Bevölkerung und das Gesundheitssystem insgesamt hat. Menschen mit einer guten Gesundheitskompetenz sind besser in der Lage, Gesundheitsinformationen zu verstehen, zu bewerten und anzuwenden. Mehr Gesundheitskompetenz ermöglicht es Patient:innen, fundierte Entscheidungen in Bezug auf ihre Gesundheit zu treffen, empfohlenen Behandlungspläne besser zu befolgen oder durch Teilnahme an präventiven Maßnahmen Krankheiten ganz zu vermeiden. Ergebnisse der bisher in Deutschland durchgeführten Forschungen zur Gesundheitskompetenz zeigen, dass Menschen mit geringer

---

<sup>10</sup> Wensing, J. Szecsenyi et al 2019

<sup>11</sup> K. Karimova et al. 2019

Gesundheitskompetenz kränker sind und damit auch höhere Kosten für das Gesundheitssystem verursachen.<sup>12</sup>

HÄPPI-Teams sollen insbesondere auch bei Personen mit niedriger Gesundheitskompetenz (vulnerable Gruppen) durch gezielte Ansprache (Impfaufklärung, Raucherentwöhnung, Klimaresiliente Beratung u. a.) helfen, die Gesundheitskompetenz zu stärken.

#### Ambulantisierung befördern (HÄPPI-Plus)

HÄPPI werden mit der nächsten Entwicklungsstufe in der Lage sein, den Umfang ambulanter Versorgungsoptionen modular zu erweitern, sofern die rechtlichen und finanziellen Rahmenbedingungen gegeben sind. Beispielsweise wäre eine stationersetzende Pflege oder andere stationersetzende Behandlungen möglich. Ein weiterer alternativer Baustein des HÄPPI-Plus können aufsuchende, interprofessionelle Kriseninterventionsteams sein. Eine umfassende Darstellung des HÄPPI-Plus erfolgt in gesonderten Veröffentlichungen.

## Versorgungslandschaft

Selektivverträge eröffnen Raum für innovative Versorgungsansätze und -technologien. Die Hausarztzentrierte Versorgung (HZV) nach § 73b SGB V ermöglicht eine schnelle Integration von neuen Versorgungskonzepten mit großer Reichweite. Darüber hinaus zeigt die HZV wie eine erfolgreiche Versorgungssteuerung unter Leitung eines Hausarztpraxisteams funktioniert. Diese Strukturen bilden die Basis zur Integration des HÄPPI in die Versorgungslandschaft. Die Umsetzung eines HÄPPI kann als zentrale oder dezentrale Versorgungsform gestaltet werden, d.h. HÄPPI kann als zentrales Versorgungsangebot nach dem Prinzip „alles unter einem Dach“ agieren, wie auch aus einem Netzwerk herausgebildet werden. Hierbei wird einem wesentlichen Merkmal des HÄPPI Rechnung getragen, sich an die regionalen Versorgungsstrukturen und Bedarfe auszurichten und nicht starre Strukturen zu etablieren.

## Gründung und Zusammenarbeit im HÄPPI-Kernteam

Im HÄPPI steht die hausärztliche Versorgung durch den/die Hausarzt:in im Mittelpunkt. Das dargelegte Konzept wirkt damit gegen einen derzeitigen Trend, dass Finanzinvestoren Arztpraxen aufkaufen und auf Gewinne spekulieren. Die Gesundheitsversorgung ist eine grundlegende menschliche Notwendigkeit, die auf ethischen Prinzipien und sozialer Verantwortung basiert. Gewinnorientierte Interessen könnten mit diesen ethischen Prinzipien kollidieren und die Priorität auf das Wohlergehen der Patienten in den Hintergrund drängen. Aufgrund dessen erfolgt die HÄPPI-Gründung durch mindestens eine/n Hausarzt:in, die als hausärztliche Direktion im HÄPPI agiert. Bei Praxisformen mit mehreren Teilhabenden muss mind. ein hausärztliche:r Teilhabende:r vorhanden sein. Die hausärztliche Direktion kann die Umsetzung der Leitung und/oder Koordination an geeignete HÄPPI-Teammitglieder übertragen.

---

<sup>12</sup> Schaeffer D. et al. 2016

Zum HÄPPI-Kernteam gehören zusätzlich mindestens eine Person eines nicht-ärztlichen, akademischen Gesundheitsberufes (z. B. akademisierte VERAH oder Physician Assistant). Die Etablierung neuer Berufsgruppen oder neuen Versorgungsebenen kann die Versorgungsqualität steigern, sofern Regelungen zur Kommunikation und Zusammenarbeit im Team erstellt sind. Daher wird innerhalb des HÄPPI-Teams ein starker Fokus auf die Vereinbarung von Regelungen zur Zusammenarbeit gelegt, um eine nahtlose und kooperative Patientenversorgung zu gewährleisten. Hierbei sollen Aspekte wie Rollen und Verantwortlichkeiten aller Teammitglieder und der interne Kommunikationsaustausch definiert werden.

## Vergütung

Die Abrechnungsmodalitäten sollten im HÄPPI nicht auf Quantität von Leistungen, sondern auf Patientenwohl fokussieren, wie es bereits jetzt im Rahmen der HZV ermöglicht wird. Die derzeitigen EBM-Abrechnungsmöglichkeiten reichen für eine kostendeckende Finanzierung nicht aus.

Die Kostenkalkulation für ein HÄPPI ist ein komplexer Prozess, der eine detaillierte Analyse der verschiedenen Kostenarten und -positionen erfordert. Innerhalb der HZV besteht die nötige Flexibilität zur Vereinbarung neuer Vergütungspositionen oder -konzepte.

## Kooperation

Die Behandlung von Patienten erfordert oft ein breites Spektrum an Fachkenntnissen und eine ganzheitliche Herangehensweise. In diesem Kontext gewinnt die interprofessionelle Kooperation, bei der Angehörige verschiedener Gesundheitsberufe zusammenarbeiten, um die bestmögliche Versorgung zu gewährleisten, immer mehr an Bedeutung.

Eine interprofessionelle Zusammenarbeit ermöglicht es, die Expertise und Fähigkeiten verschiedener Gesundheitsberufe zu nutzen, um eine ganzheitliche Betreuung der Patienten zu ermöglichen. Durch den Austausch von Informationen und Perspektiven können die Behandlungsteams individuell auf die Bedürfnisse jedes Patienten eingehen. So können komplexe medizinische Fälle besser verstanden und bewertet werden, was zu einer besseren Behandlung und ggf. zu einer schnelleren Genesung führt. Durch die gemeinsame Verantwortung für die Patientenversorgung und eine offene und transparente Kommunikation zwischen den HÄPPI-Teammitgliedern können potenzielle Risiken frühzeitig erkannt und vermieden werden. Damit dies gelingt, ist es zwingend notwendig eine klare Aufgabenverteilung zwischen den HÄPPI-Teammitgliedern zu erstellen.

Eines der herausragendsten Vorteile einer interprofessionellen Zusammenarbeit liegt in der Förderung von Innovationen und Best Practices. Die interprofessionelle Kooperation schafft eine Plattform für den Austausch von Wissen und Erfahrungen zwischen den Gesundheitsberufen. Dadurch können Best Practices identifiziert und innovative Ansätze in der Patientenversorgung angewandt werden. Die Integration verschiedener Perspektiven kann dazu beitragen, neue Lösungen für komplexe medizinische Herausforderungen zu entwickeln. Dies kann wiederum zu einer Stärkung der Berufsidentität führen, sprich es ist ein Ansatz dem potenziellen hausärztlichen wie auch nichtärztlichen Fachkräftemangel entgegenzuwirken.

Die Vorteile der interprofessionellen Kooperation werden im HÄPPI gebündelt. Das HÄPPI lebt durch verbindliche Kooperationen zwischen dem HÄPPI-Kernteam und weiteren Akteuren im Gesundheitswesen, die an den regionalen Bedarf ausgerichtet sind. Kooperationen können

geschlossen werden mit z. B. Kommunen, Gesundheitskiosken, Apotheken, Therapieberufen, Fachärzt:innen (z. B. Psychiater:innen) oder Sozialarbeiter:innen.

Die Förderung von Interprofessionalität im HÄPPI erfordert allerdings auch eine gezielte Herangehensweise und eine offene Einstellung der beteiligten HÄPPI-Teammitglieder. Zentrales Element der verbindlichen Kooperationen liegt in der Umsetzung der nachfolgenden Anforderungen:

- Fallbesprechungen:  
Regelmäßige Teamtreffen und Fallbesprechungen ermöglichen dem HÄPPI-Team, sich auszutauschen, Fragen zu stellen, Informationen zu teilen und gemeinsam Patientenfälle zu besprechen. Dadurch wird das Verständnis für die Behandlungspläne und die Koordination der Versorgung verbessert.
- Qualitätszirkel:  
Das HÄPPI-Kernteam und deren Kooperationspartner besuchen gemeinsame interprofessionelle Qualitätszirkel, bei denen über aktuelle Themen diskutieren wird und best practices herausgearbeitet werden. Die interprofessionellen QZs können an die in der HZV bestehenden PTQZs angegliedert werden. Dies fördert das Verständnis für die jeweiligen Fachbereiche und die Zusammenarbeit im HÄPPI-Team.
- Festlegungen zur Verfügbarkeit innerhalb der medizinischen Notwendigkeit:  
Im HÄPPI-Team müssen gemeinsame Ziele und ein klares gemeinsames Verständnis entwickelt sein, um die optimale Patientenversorgung zu ermöglichen. Hierzu gehört die gemeinsame Festlegung von z.B. Red Flags.
- Festlegung von Standards für den Informations- und Wissensaustausch:  
Durch den Einsatz moderner Technologien wie auch Kommunikationstools wird der Informationsaustausch im HÄPPI-Team erleichtert, Missverständnisse vermieden und damit die Patientensicherheit gefördert.

Neben den verbindlichen Regelungen bleibt es dem HÄPPI-Team überlassen, weitere Indikatoren zur Förderung der Zusammenarbeit, zur Patientenzentrierung oder auch zur Fehlerkultur festzulegen. Als wünschenswerte fakultative Regelung gilt die Festlegung von gemeinsamen Qualitätssicherungsmaßnahmen wie Feedbackgesprächen. Dies fördert die Teamkultur und regt zu einem respektvollen Miteinander an.

Die vertragliche Umsetzung verbindlicher Kooperationen könnte im Rahmen von Verträgen nach § 140a SGB V angeknüpft an die HZV nach § 73b SGB V geregelt werden.

## Patient Reported Outcomes

Patient Reported Outcomes (PROs) sind Informationen über den Gesundheitszustand eines Patienten, die direkt von ihm selbst gemeldet werden. Diese Informationen werden in der Regel durch Fragebögen oder Interviews gesammelt und spiegeln die subjektiven Empfindungen, Erfahrungen und Einschätzungen des Patienten in Bezug auf seine Gesundheit, seine Symptome, seine Lebensqualität und seinen Funktionsstatus wider. PROs ermöglichen damit, ein umfassenderes Bild von der Wirkung einer Krankheit oder einer medizinischen Behandlung zu erhalten. Die Erfassung der PROs gehen damit über das klinische Bild hinaus. Die Perspektive des Patienten wird direkt berücksichtigt und ermöglicht es, die Auswirkungen von Krankheiten und medizinischen Interventionen auf die Lebensqualität und das Wohlbefinden der Patienten besser zu verstehen. Beispiele für PROs umfassen Fragen zur Schmerzintensität, zur körperlichen Funktionsfähigkeit, zur emotionalen Gesundheit, zur sozialen Teilhabe und zur allgemeinen Lebensqualität.<sup>13</sup>

Im HÄPPI ist angedacht, dass das Hausarztpraxisteam das Einverständnis des Patienten einholt, zur Erhebung der PROs über Fragebögen durch ein externes wissenschaftliches Institut, welches die Fragebögen konzipiert und gleichzeitig die Ergebnisse der Befragung an das Hausarztpraxisteam weiterleitet. Um dem Gedanken der Digitalisierung auch hier einzubauen, wird der Patient über einen Link auf einen digital zu erfassenden Fragebogen geleitet. Das Hausarztpraxisteam integriert die Erkenntnisse aus der PRO-Befragung in zukünftige Behandlungsabläufe. Damit wird innerhalb eines HÄPPI eine höhere Patientenzentrierung und Qualitätsverbesserung ermöglicht.

## Neugestaltung des Workflows

Die wachsende Bevölkerung und die zunehmende Lebenserwartung führen zu einer höheren Nachfrage nach medizinischer Versorgung. Dies bedeutet, dass Hausarztpraxen mehr Patienten behandeln müssen, was u.a. zu längeren Wartezeiten und einer erhöhten Arbeitsbelastung für das Personal führt. Eine Neugestaltung der Arbeitsabläufe, die auf Digitalisierung und Delegation basiert, kann dazu beitragen, den Anforderungen gerecht zu werden und eine effizientere Versorgung zu ermöglichen. So können z.B. automatisierte Terminvereinbarungen und Erinnerungen Ausfallzeiten reduzieren und eine bessere Nutzung der verfügbaren Ressourcen ermöglichen. Gleichzeitig kann die Delegation von Aufgaben an qualifizierte HÄPPI-Teammitglieder die/den Hausärzt:in entlasten und die Patientenzentrierung stärken.

Die Herausforderungen, die mit der Einführung von Digitalisierung und Delegation verbunden sind, sollten sorgfältig angegangen werden, um die Vorteile dieses Ansatzes voll ausschöpfen zu können und eine zukunftsfähige Gesundheitsversorgung zu gewährleisten.

In den **Anlagen 1** und **2** werden folgende Workflows detaillierter beschrieben:

1. Umsetzung einer klaren, ressourcenschonenden und effizienten Rollenteilung, die sich an der Qualifikation der HÄPPI-Teammitglieder orientiert. (Siehe Wirkungsfelder)
2. Optimale Zuweisung in die richtige Versorgungsebene mittels maximalen Einsatzes der im Moment zur Verfügung stehenden digitalen/KI-Anwendungen (Siehe Prozessoptimierung)

---

<sup>13</sup> Steinbeck et al. 2021

## **Anlage 1: Wirkungsfelder**

### **Umsetzung einer klaren, ressourcenschonenden und effizienten Rollenteilung, die sich an der Qualifikation der HÄPPI-Teammitglieder orientiert.**

HÄPPI bildet eine teamorientierte Hausarztpraxis mit interprofessioneller Ausrichtung unter medizinischer Verantwortung einer Hausärztin bzw. eines Hausarztes ab. Mit Blick auf das Aufgabenspektrum und den daraus resultierenden Versorgungsauftrag einer hausärztlich geleiteten Praxis leitet sich ein festes Kernteam für das HÄPPI ab. Das Kernteam sollte aus Hausarzt/Hausärztin, MFA, VERAH sowie weiteren akademisierten nicht-ärztlichen Gesundheitsfachberufen wie die akademisierte VERAH/ Physician Assistant bestehen. Darüber hinaus sind weitere Berufsgruppen abhängig von den regionalen Bedürfnissen integrierbar.

Das HÄPPI-Konzept bietet durch Delegation von heilkundlichen, medizinischen (Be-)Handlungen an medizinisches Fachpersonal eine Zunahme der verfügbaren Behandlungszeit für ärztliche Behandlung. Durch die Möglichkeit, Bürokratie an Verwaltungsfachkräfte abzugeben, werden auch für medizinisches Fachpersonal mehr Zeiteinheiten für Versorgungs-Zeit generiert. Dies ist allerdings in kleinen Organisationseinheiten wirtschaftlich ungleich schwerer abbildbar. In der Summe entsteht durch Delegation auf verschiedenen Ebenen mehr Versorgungs-Zeit für die Arbeit mit dem Patienten.

Zur Nachvollziehbarkeit und Einordnung, ob eine medizinische Aufgabe an qualifizierte HÄPPI-Teammitglieder entsprechend der Wirkungsfelder delegiert werden kann/sollte, wird die nachstehende Abbildung (eigene Darstellung) herangezogen. Über die Einteilung der Patienten in akut bzw. chronische Erkrankung mit jeweils komplex bzw. gering komplexer Ausprägung kann ein erster wesentlicher Schritt zur Identifizierung von Delegationspotential an nicht ärztliches Praxispersonal vorgenommen werden, z.B. benötigt ein gut eingestellter Chroniker (z.B. über das DMP Diabetes) oder Bagatellerkrankungen wie Erkältungen mit fehlenden Red Flags (Akuterkrankung mit geringer Komplexität) keine persönliche ärztliche Sichtung, sofern das zuständige nicht-ärztliche HÄPPI-Teammitglied über die Fähigkeiten und Kenntnisse zur Einordnung des vorliegenden Sachverhaltes verfügt. In dem Rahmen fungiert qualifiziertes Personal als vorsortierende Instanz für das ärztliche Konsil.

Im Laufe der nachstehenden Wirkungsfelder sollte die Patienteneinteilung bei der Zuordnung zu den einzelnen Aufgaben einer Hausarztpraxis gedanklich mitgeführt werden.

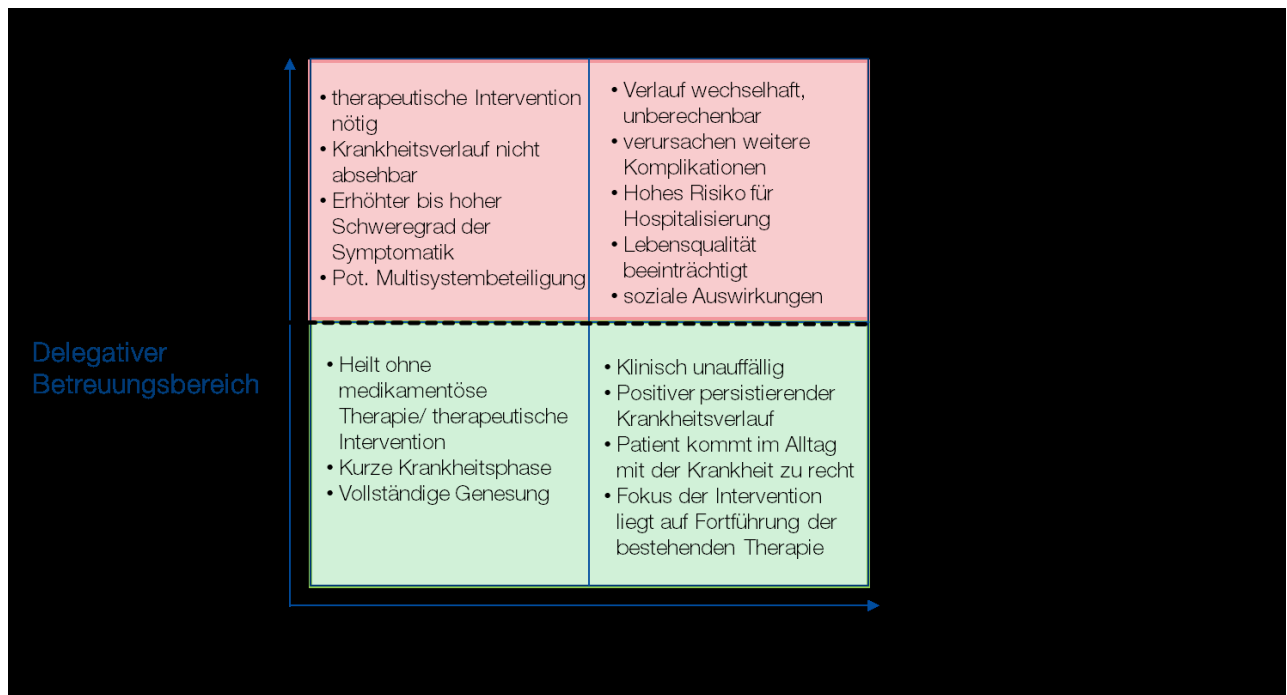

Abbildung (eigene Darstellung): Einteilung der Patient:innen nach der Notwendigkeit eines ärztlichen Kontaktes

Im Folgenden werden die identifizierten Aufgaben einer hausärztlichen Praxis den Mitgliedern des Praxisteams zugeordnet und mit Fokus auf das maximale Delegationspotential als Wirkungsfelder den entsprechenden Teammitgliedern zugeordnet. Die Wirkungsfelder gelten als Beispiel einer Variante zur konsequenten Aufgabenteilung in einer Hausarztpraxis anhand der Qualifizierung und bieten damit eine mögliche Handhabung zur Umsetzung in der eigenen HÄPPI-Hausarztpraxis.

Die einzelnen Tätigkeiten in einer Hausarztpraxis wurden in neun Bereiche geclustert:

- Labor
- Mobiles Team
- Schulungen und Beratungen
- Organisation und Administration
- Formularwesen
- Technische Untersuchungen
- Anamneseerhebung unter Berücksichtigung des biopsychosozialen Krankheitsmodell
- klinischer und Score gestützte Untersuchungstechniken
- Anwendungsbereich KI/ digitale Tools

Darüber hinaus wird das HÄPPI-Kernteam abhängig vom Tätigkeitsfeld erweitert, um z.B. Servicekraft oder Praxismanagerin.

Im Wirkungsfeld „Labor“ sind Tätigkeiten des Hausarztpraxisteams hinterlegt, die für die Labordiagnostik notwendig sind. Im optimalen Fall erfolgt ausschließlich die Laborbesprechung bei auffälligen Befunden durch den Hausarzt/die Hausärztin, Laborbefunde ohne Auffälligkeiten können durch das Hausarztpraxisteam kommuniziert werden. Alle weiteren Aufgaben, die Voraussetzungen sind zur Durchführung einer Labordiagnostik sollte durch Delegation über das in der nachstehenden Abbildung bevorzugte Personal durchgeführt werden.

| Labor                         |                     |            |              |                                                                         |                         |
|-------------------------------|---------------------|------------|--------------|-------------------------------------------------------------------------|-------------------------|
|                               | <i>Servicekraft</i> | <i>MFA</i> | <i>VERAH</i> | <i>akademisierte<br/>Gesundheitsberuf<br/>(z.B. PA, aka.<br/>VERAH)</i> | <i>Hausarzt:in</i>      |
| Blutentnahme                  | o                   | 1          | x            | x                                                                       | x                       |
| Versand und<br>Administration | 1                   | 1          | x            | x                                                                       | x                       |
| Impfung                       | o                   | 1          | x            | x                                                                       | x                       |
| Laborbesprechung              | o                   | (x)        | x            | 1 (unauffällige<br>Werte)                                               | 1 (auffällige<br>Werte) |
| Terminvergabe                 | 1                   | x          | x            | x                                                                       | x                       |

Legende: o = keine Delegation möglich; x = Delegation möglich; (x) = begrenzt delegierbar; 1 = bevorzugte Delegation

Im Wirkungsfeld „**Mobiles Team**“ werden die Tätigkeiten einer Hausarztpraxis zusammengefasst, die nicht innerhalb der Praxisräumlichkeiten durchgeführt werden können. Klassische Bereiche sind der Haus- oder Pflegeheimbesuch, der im Routinefall durch die qualifizierte VERAH ausgeführt werden kann.

| Mobiles Team                                                                                   |                     |            |              |                                                                         |                    |
|------------------------------------------------------------------------------------------------|---------------------|------------|--------------|-------------------------------------------------------------------------|--------------------|
|                                                                                                | <i>Servicekraft</i> | <i>MFA</i> | <i>VERAH</i> | <i>akademisierte<br/>Gesundheitsberuf<br/>(z.B. PA, aka.<br/>VERAH)</i> | <i>Hausarzt:in</i> |
| Hausbesuche in der<br>Häuslichkeit (Routine wie<br>auf Anforderung)                            | o                   | x          | 1            | x                                                                       | x                  |
| Besuche in<br>Behinderteneinrichtungen<br>und Pflegeheimen<br>(Routine wie auf<br>Anforderung) | o                   | x          | 1            | x                                                                       | x                  |

Legende: o = keine Delegation möglich; x = Delegation möglich; (x) = begrenzt delegierbar; 1 = bevorzugte Delegation

Im Folgenden wird eine Auflistung der Aufgaben innerhalb des Bereichs „**Schulungen und Beratungen**“ dargestellt. Schulungen und Beratungen nehmen oftmals „nebenbei“ einen beträchtlichen Anteil an Zeit im hausärztlichen Aufgabenspektrum in Anspruch. Neben den allgemein bekannten Schulungs- und Beratungsformaten existierten innerhalb der Hausarztzentrierten Versorgung weitere Versorgungsprogramme wie PraCMan oder auch VERAH TopVersorgt. In beiden Versorgungsprogrammen erhalten vulnerable Patientengruppen eine intensivere Betreuung durch

qualifiziertes Praxispersonal, der VERAH. Evaluationen belegen die positiven Effekte auf die Patientenzufriedenheit wie auch auf die Vermeidung von Hospitalisierung.<sup>14</sup>

| Mitwirkung bei Schulungen und Beratungen        |                     |            |              |                                                              |                    |
|-------------------------------------------------|---------------------|------------|--------------|--------------------------------------------------------------|--------------------|
| <i>Aufgabenbereich</i>                          | <i>Servicekraft</i> | <i>MFA</i> | <i>VERAH</i> | <i>akademisierter Gesundheitsberuf (z.B. PA, aka. VERAH)</i> | <i>Hausarzt:in</i> |
| Angehörigenberatung                             | o                   | x          | 1            | 1                                                            | x                  |
| Beratung zum Gesundheitszustand                 | o                   | x          | 1            | 1                                                            | x                  |
| Beratung zur Therapie                           | o                   | o          | 1            | 1                                                            | x                  |
| Device Schulung (z.B. Inhalatoren)              | o                   | 1          | x            | x                                                            | x                  |
| Klimaresiliente Versorgung/ Gesundheitsberatung | o                   | x          | x            | x                                                            | x                  |
| PraCMan                                         | o                   | o          | 1            | x                                                            | x                  |
| Sturzprophylaxe                                 | o                   | x          | 1            | 1                                                            | x                  |
| Ernährungsberatung                              | o                   | o          | 1            | 1                                                            | x                  |
| DMP-Schulung                                    | o                   | x          | 1            | 1                                                            | x                  |

Legende: o = keine Delegation möglich; x = Delegation möglich; (x) = begrenzt delegierbar; 1 = bevorzugte Delegation

Im Bereich der „**Organisation und Administration**“ empfehlen wir, das Hausarztpraxisteam um eine/n Praxismanager:in zu erweitern.

Ein/e Praxismanager:in ist für die Organisation, Verwaltung und Koordination der täglichen Arbeitsabläufe in der Praxis verantwortlich. Die genauen Aufgaben können von Praxis zu Praxis unterschiedlich sein, aber im Allgemeinen umfassen sie:

- Personalmanagement: Die Praxismanager:in ist für das Management des Personals in der Praxis zuständig, was die Rekrutierung, Einstellung, Schulung und Motivation von Mitarbeitern einschließt.
- Finanzmanagement: Die Praxismanager:in überwacht und verwaltet die Finanzen der Praxis, einschließlich des Budgets, der Buchhaltung und der Abrechnung.

<sup>14</sup> Freund et al. 2016

- Patientenmanagement: Die Praxismanager:in ist für das Management des Patientenflusses in der Praxis zuständig, einschließlich der Terminplanung, der Patientenaufnahme, der Überweisungen und der Nachverfolgung von Patienten.
- Qualitätsmanagement: Die Praxismanager:in ist für die Überwachung und Umsetzung von Qualitätskontrollen und -maßnahmen verantwortlich, um sicherzustellen, dass die Praxis den höchsten Standard an medizinischer Versorgung bietet.
- Infrastrukturmanagement: Die Praxismanager:in ist für das Management der Infrastruktur in der Praxis zuständig, einschließlich der Wartung und Instandhaltung von medizinischen Geräten und Einrichtungen.<sup>15</sup>
- Hygienemanagement: Die Praxismanager:in ist verantwortlich für die Einhaltung der Hygienestandards und -vorschriften in der Praxis.

Insgesamt kann die Praxismanagerin ein wichtiger Bestandteil des Teams in einer Hausarztpraxis sein, da sie sicherstellt, dass alle Arbeitsabläufe reibungslos und effizient verlaufen, damit die Patienten die bestmögliche Versorgung erhalten. Dies spiegelt sich auch in unserer Bewertung wider. Der Großteil an Aufgaben aus dem Bereich „**Organisation und Administration**“ sollte bevorzugt an sie übergeben werden, um die Versorgung-Zeit für Patienten zu erhöhen.

| Organisation und Administration                                  |                     |            |                   |                                                                         |                    |                         |
|------------------------------------------------------------------|---------------------|------------|-------------------|-------------------------------------------------------------------------|--------------------|-------------------------|
|                                                                  | <i>Servicekraft</i> | <i>MFA</i> | <i>VERA<br/>H</i> | <i>akademisierte<br/>Gesundheitsberuf<br/>(z.B. PA, aka.<br/>VERAH)</i> | <i>Hausarzt:in</i> | <i>Praxismanager:in</i> |
| Organisatorisch<br>Kooperation<br>Leistungserbringer<br>(FA, KH) | 1                   | x          | x                 | x                                                                       | x                  | 1                       |
| Kommunikation<br>Krankenkasse/Behörde etc.                       | x                   | x          | x                 | x                                                                       | x                  | x                       |
| IT                                                               | 1                   | x          | x                 | x                                                                       | x                  | 1                       |
| Abrechnung                                                       | 0                   | x          | x                 | x                                                                       | x                  | 1                       |
| Bestellung                                                       | 1                   | x          | x                 | x                                                                       | x                  | 1                       |
| Praxisstruktur/-management                                       | x                   | x          | x                 | x                                                                       | x                  | 1                       |
| Qualitätsmanagement                                              | x                   | x          | x                 | x                                                                       | x                  | 1                       |
| Personal                                                         | x                   | x          | x                 | x                                                                       | x                  | 1                       |

<sup>15</sup> Chat GPT, März 2023

|                                     |   |   |   |   |   |   |
|-------------------------------------|---|---|---|---|---|---|
| Buchhaltung                         | 1 | x | x | x | x | 1 |
| Arbeitsschutz und Hygiene           | 1 | x | x | x | x | 1 |
| Zeitmanagement (z.B. Terminvergabe) | x | x | x | x | x | 1 |

Legende: o = keine Delegation möglich; x = Delegation möglich; (x) = begrenzt delegierbar; 1 = bevorzugte Delegation

Das Formularwesen in einer Hausarztpraxis umfasst eine Vielzahl von Formularen und Dokumenten. Aufgrund der Vielzahl wird im nachstehenden Bereich „**Formularwesen**“ einer Auswahl an Formularen eine bevorzugte Delegation zugewiesen. Grundsätzlich kann die Vorbereitung der nachstehenden Formulare/ Verordnungen/ Dokumente durch nicht-ärztliches Personal erfolgen. Gemäß der bestehenden Berufsordnung ist allerdings nur das ärztliche Teammitglied bei bestimmten nachstehend aufgelisteten Formularen/ Verordnungen/ Dokumente in der Lage zur Legitimation.

| Mitwirkung im Formularwesen (beispielhafte Aufzählung) bei                                    |                     |            |              |                                                              |                    |
|-----------------------------------------------------------------------------------------------|---------------------|------------|--------------|--------------------------------------------------------------|--------------------|
|                                                                                               | <i>Servicekraft</i> | <i>MFA</i> | <i>VERAH</i> | <i>akademisierter Gesundheitsberuf (z.B. PA, aka. VERAH)</i> | <i>Hausarzt:in</i> |
| Vorbereitung med. Anträge (z.B. Reha-Antrag)                                                  | o                   | x          | x            | 1                                                            | 1                  |
| Einordnung med. Anträge (z.B. Reha-Antrag)                                                    | o                   | o          | o            | (1)                                                          | 1                  |
| Erstverordnung häusliche Krankenpflege                                                        | o                   | x          | x            | 1                                                            | x                  |
| Folgeverordnung häusliche Krankenpflege                                                       | 1                   | x          | x            | x                                                            | x                  |
| Folgerezepte für Dauermedikation                                                              | 1                   | x          | x            | x                                                            | x                  |
| Rezepte Akutmedikation                                                                        | o                   | o          | o            | (x)                                                          | 1                  |
| Befüllung von Medikationsplänen (z.B. bundeseinheitlicher Medikamentenplan – BMP)             | o                   | (x)        | x            | 1                                                            | 1                  |
| Ärztliches Kuratieren von Medikationsplänen (z.B. bundeseinheitlicher Medikamentenplan – BMP) | o                   | o          | o            | o                                                            | 1                  |
| Erstrezept Heil- und Hilfsmittel                                                              | o                   | o          | o            | (1)                                                          | 1                  |
| Folgerezept Heil- und Hilfsmittel                                                             | 1                   | 1          | x            | x                                                            | x                  |
| Arbeitsunfähigkeitsbescheinigung                                                              | o                   | (x)        | 1            | 1                                                            | x                  |

|                          |   |   |   |   |   |
|--------------------------|---|---|---|---|---|
| Überweisungen            | x | x | 1 | 1 | x |
| Einwilligungserklärungen | x | x | x | x | x |

Legende: o = keine Delegation möglich; x = Delegation möglich; (x) = begrenzt delegierbar; 1 = bevorzugte Delegation

Die Diagnostik in der Hausarztpraxis kann eine Vielzahl von Verfahren und Tests umfassen. Im Bereich **„Technische Untersuchungen“** wird als Besonderheit bei den Tests eine Unterscheidung zwischen der Durchführung und der Auswertung aufgrund der Qualifizierung der einzelnen Praxisteammitglieder vorgenommen.

| Mitwirkung bei technischen Untersuchungen (beispielhafte Aufzählung) bei ... |                     |            |              |                                                              |                    |
|------------------------------------------------------------------------------|---------------------|------------|--------------|--------------------------------------------------------------|--------------------|
| <i>Aufgabenbereich</i>                                                       | <i>Servicekraft</i> | <i>MFA</i> | <i>VERAH</i> | <i>akademisierter Gesundheitsberuf (z.B. PA, aka. VERAH)</i> | <i>Hausarzt:in</i> |
| Sonographie der abdominalen Organe                                           | o                   | o          | o            | 1                                                            | x                  |
| Sonographie der Schilddrüse                                                  | o                   | o          | o            | 1                                                            | x                  |
| Anlegen von EKG/Langzeit-EKG                                                 | o                   | 1          | x            | x                                                            | x                  |
| Auswerten von EKG/Langzeit-EKG                                               | o                   | x          | x            | 1                                                            | x                  |
| Anlegen von Langzeit-RR                                                      | o                   | 1          | x            | x                                                            | x                  |
| Auswertung von Langzeit-RR, ggf. digital unterstützt                         | o                   | x          | x            | 1                                                            | x                  |
| Durchführung Lufu                                                            | x                   | 1          | x            | x                                                            | x                  |
| Auswertung Lufu, ggf. digital unterstützt                                    | o                   | x          | x            | 1                                                            | x                  |
| Bewertung der erhobenen Befunde sowie deren Einordnung in den Gesamtkontext  | o                   | o          | o            | o                                                            | 1                  |

Legende: o = keine Delegation möglich; x = Delegation möglich; (x) = begrenzt delegierbar; 1 = bevorzugte Delegation

Die **„Anamneseerhebung unter Berücksichtigung des biopsychosozialen Krankheitsmodells“** ermöglicht es, ein umfassendes Bild von der Gesundheit eines Patienten zu erhalten. Auch in diesem Bereich kann ein großer Teil der Arbeitsaufwände an nicht ärztlich qualifizierte Praxisteammitglieder übergeben werden. Dennoch wird als weiterhin bestehende ärztliche Tätigkeit die Bewertung und Einordnung der erhobenen Patientendaten in den Gesamtkontext gewertet.

| Mitwirkung bei Anamneseerhebung unter Berücksichtigung des biopsychosozialen Krankheitsmodell |                     |            |              |                                                              |                    |
|-----------------------------------------------------------------------------------------------|---------------------|------------|--------------|--------------------------------------------------------------|--------------------|
|                                                                                               | <i>Servicekraft</i> | <i>MFA</i> | <i>VERAH</i> | <i>akademisierter Gesundheitsberuf (z.B. PA, aka. VERAH)</i> | <i>Hausarzt:in</i> |
| soziale und berufliche Anamnese                                                               | o                   | 1          | x            | x                                                            | x                  |
| Familienanamnese                                                                              | o                   | x          | x            | x                                                            | x                  |
| aktuelle krankheitsbezogene Anamnese                                                          | o                   | x          | x            | 1                                                            | x                  |
| individuellen Krankheitsgeschichte                                                            | 0                   | x          | x            | 1                                                            | x                  |
| strukturierte Erfassung der aktuellen Medikation, von Allergien und Unverträglichkeiten       | o                   | 1          | x            | x                                                            | x                  |
| Bewertung der erhobenen (anamnestischen) Daten sowie Einordnung im Gesamtkontext              | o                   | o          | o            | o                                                            | 1                  |

Legende: o = keine Delegation möglich; x = Delegation möglich; (x) = begrenzt delegierbar; 1 = bevorzugte Delegation

Die „**klinischen und Score gestützten Untersuchungstechniken**“ in einer Hausarztpraxis umfassen eine Vielzahl an Verfahren und Messungen, daher wird in der nachstehenden Tabelle auf Bereiche bzw. Zielgruppen abgehoben.

| Mitwirkung bei klinischen und Score gestützten Untersuchungstechniken ...          |                     |            |              |                                                              |                    |
|------------------------------------------------------------------------------------|---------------------|------------|--------------|--------------------------------------------------------------|--------------------|
|                                                                                    | <i>Servicekraft</i> | <i>MFA</i> | <i>VERAH</i> | <i>akademisierter Gesundheitsberuf (z.B. PA, aka. VERAH)</i> | <i>Hausarzt:in</i> |
| Bei Kindern und Jugendlichen                                                       | 0                   | x          | x            | 1                                                            | x                  |
| im Bereich Bewegungsapparat/Schmerzen/Verletzungen                                 | 0                   | x          | x            | 1                                                            | x                  |
| im Bereich der Haut/Schleimhäute                                                   | 0                   | x          | x            | 1                                                            | x                  |
| im Bereich Sexualität, Familienplanung, Geschlechtsorgane und ableitender Harnwege | 0                   | x          | x            | 1                                                            | x                  |

|                                                                                               |   |   |   |   |   |
|-----------------------------------------------------------------------------------------------|---|---|---|---|---|
| im Bereich der inneren Organe<br>(Lunge, Herz, Leber, Niere, Milz,<br>Darm, Schilddrüse usw.) | 0 | x | x | 1 | x |
| im Bereich des Nervensystems und<br>der psychischen Erkrankungen                              | 0 | x | x | 1 | x |
| im Bereich der Atmungsorgane und<br>des Ohres                                                 | 0 | x | x | 1 | x |
| im Bereich Änderungen des<br>Bewusstseins, Denkens und Fühlens<br>/ Psychosoziales            | 0 | x | x | 1 | x |
| im Bereich Stoffwechsel und<br>Verdauungssystem                                               | 0 | x | x | 1 | x |
| im Bereich Palliativmedizin                                                                   | 0 | x | x | 1 | x |
| bei geriatrischen Patient:innen                                                               | 0 | x | x | 1 | x |

Legende: 0 = keine Delegation möglich; x = Delegation möglich; (x) = begrenzt delegierbar; 1 = bevorzugte Delegation

In den letzten Jahren hat die „**Künstliche Intelligenz (KI)**“ bzw. der Einsatz von digitalen Tools Einzug in das Gesundheitswesen gefunden. Eine der spannendsten Anwendungen ist die Rolle der KI zur Entlastung in der Hausarztpraxis. In diesem Zuge wird KI/Digitale Tools als „digitales Teammitglied“ in den Wirkungsfeldern mitgedacht. In der nachstehenden Tabelle sind beispielhafte Bereiche aufgeführt, bei denen bereits KI/ digitale Tools existieren, und damit Einfluss auf die Arbeitsweise in der Hausarztpraxis nehmen können. Weitere Bereiche müssen folgen.

| <b>KI/ digitale Tools</b>                                                                                               |
|-------------------------------------------------------------------------------------------------------------------------|
| Organisatorische Assistenz: z.B. Abrechnung, Bestellung, Personalplanung, Einsatzplanung, Formularbefüllungen           |
| Anamneseerhebungen und Ersteinschätzungen                                                                               |
| Einstreuung in richtige Ebene: Predictive Analytics zur Erstellung von Risikoprofilen                                   |
| KI-gestützte Diagnostiktools zur Diagnoseunterstützung<br>(z.B. zur dermatologischen Befundung – Telescan; Sonographie) |
| KI- gestützte Überwachungstools                                                                                         |
| Transkriptions-KI (wesentliche Erkenntnisse des Patientengesprächs in eAkte überführen)                                 |
| Terminmanagement                                                                                                        |
| Qualitätsmanagement                                                                                                     |

Insgesamt zeigt sich ein großes Potenzial an Delegationsmöglichkeiten, wodurch Hausärzt:innen entlastet und die Kompetenz der einzelnen Hausarztpraxis-Teammitglieder gestärkt werden können. Konsequente Delegation bedeutet, dass Hausärzt:innen vermehrt die komplexere Versorgung multimorbider Patienten übernehmen werden und „Bagatellerkrankungen“ durch nicht ärztliche qualifizierte Praxisteammitglieder behandelt werden.

**Derzeitiger rechtlicher Rahmen schränkt die Wirkungsfelder nicht-ärztlicher Teammitglieder des HÄPPI-Kernteams ein.**

Die derzeitige Rechtsgrundlage ermöglicht die Delegation ärztlicher Leistungen an nicht-ärztliches qualifiziertes Personal. Seit dem 01.10.2013 existiert die Vereinbarung über die Delegation ärztlicher Leistungen an nichtärztliches Personal in der ambulanten vertragsärztlichen Versorgung gemäß § 28 Abs. 1 Satz 3 SGB V, welche als Anlagen 8 und 24 zum Bundesmanteltarifvertrag-Ärzte angeschlossen ist. Allerdings erfordern die heutigen und zukünftigen Entwicklungen ein Neudenken der Delegation. Wie bereits im Jahr 2013 bewirkt der Fachkräftemangel, wie der Rückgang niedergelassener Hausärzte, die Etablierung neuer Versorgungskonzepte. Zur erfolgreichen Umsetzung neuer Versorgungskonzepte müssen die regulatorischen Rahmenbedingungen erweitert werden, um Rechtssicherheit für die Handelnden zu schaffen.

Für die Regelversorgung wird über den Bundesmantelvertrag definiert, welche Leistungen an nicht ärztliches Personal delegiert werden können (siehe Anlagen 8 und 24 des Bundesmantelvertrages). Ob eine bestimmte Leistung unter Arztvorbehalt steht, hängt nach der Rechtsprechung davon ab, ob das Erbringen einer bestimmten Leistung oder die Abwendung einer gesundheitlichen Gefährdung ärztliche Fachkenntnisse und damit das Tätigwerden eines Arztes erfordert. Darüber hinaus liegt bei der delegierenden Hausärzt:in hinsichtlich der zu delegierenden Leistung die Auswahl-, Anleitungs-, und Überwachungspflicht. Die Delegationsmöglichkeiten im BMV erfüllen derzeit nicht die Voraussetzungen, um die erarbeiteten Wirkungsfelder vollumfänglich, sprich eigenständige Durchführung von ärztlichen Leistungen durch das qualifizierte nicht ärztliche Personal, ausführen zu lassen. Das bedeutet, dass bei einer Auswahl an Tätigkeiten für das nicht ärztliche HÄPPI-Teammitglied eine unterstützende bzw. mitwirkende Rolle zugeteilt wird, statt einer selbstständig agierenden Tätigkeitsbeschreibung. In dem Zuge wurde für HÄPPI ein potenzielles Delegationskonzept entwickelt, wodurch konsequent delegiert werden kann. Folgend eine Delegationsrahmenvereinbarung, die eine konsequente Delegation ermöglichen würde:

\*\*\*\*

## **Delegationsrahmenvereinbarung**

### **§ 1**

#### **Gegenstand**

Die Vereinbarung regelt die Anforderungen für die Delegation ärztlicher Leistungen des HÄPPI-HAUSARZTES (Vertragsarzt) an nichtärztliches Personal im Hausarztpraxisteam. Geltende Regelungen zur eingeschränkten Delegation des Bundesmantelvertrages der Anlagen 8 und 24 werden durch diese Delegationsrahmenvereinbarung ersetzt.

### **§ 2**

#### **Allgemeine Anforderungen an die Delegation**

Der HÄPPI-HAUSARZT entscheidet, ob und an wen er eine Leistung delegiert. Der HÄPPI-HAUSARZT hat sicherzustellen, dass sein Hausarztpraxisteam aufgrund der beruflichen Qualifikation oder allgemeinen Fähigkeiten und Kenntnisse seiner Mitglieder für die Erbringung der delegierten Leistung geeignet ist. Der HÄPPI-HAUSARZT hat sein Hausarztpraxisteam zur selbständigen Durchführung der zu delegierenden Leistung anzuleiten (Anleitungspflicht) sowie zu überwachen (Überwachungspflicht),

sofern es zur ordnungsgemäßen Leistungserbringung erforderlich ist. Die Qualifikation des Einzelnen im Hausarztpraxisteam ist ausschlaggebend für den Umfang der Anleitung und der Überwachung.

### **§ 3**

#### **Nicht-ärztliches Personal im HÄPPI**

Zur ärztlichen Leistungserbringung gehört auch die Hilfeleistung durch nicht-ärztliches Personal, die von/m dem/den HÄPPI-HAUSÄRZT:IN bzw. durch das ärztliche Personal angeordnet und auch zu verantworten ist. Es ist zu gewährleisten, dass der/die delegierende HÄPPI-HAUSÄRZT:IN bzw. das delegierende ärztliche Personal aus dem Hausarztpraxisteam gegenüber dem nicht-ärztlichen Personal des Hausarztpraxisteams über eine, durch eine schriftliche Vereinbarung sicherzustellende, Weisungsbefugnis verfügt. Als nicht-ärztlich delegationsfähige Leistungen werden alle in einem HÄPPI anfallenden Leistungen angesehen, die nicht explizit durch § 5 ausgenommen sind.

### **§ 4**

#### **Arztvorbehalt**

Der/die HÄPPI-HAUSÄRZT:IN darf Leistungen, die aufgrund der erforderlichen besonderen Fachkenntnisse nur höchstpersönlich erbracht werden, können nicht delegieren. Dazu gehört vor allem die Einordnung (basierend auf den vorliegenden Ergebnissen delegierter Leistungen) in den Gesamtkontext.

### **§ 5**

#### **Haftung**

Dem/Der delegierenden HÄPPI-HAUSÄRZT:IN wird die delegierte Leistung als eigene Leistung zugerechnet. Eine gleichzeitige deliktische Verantwortlichkeit des Mitarbeitenden im HÄPPI ist damit nicht ausgeschlossen.

\*\*\*\*

Entsprechend der Neufassung eines Delegationskonzeptes müssen zwangsweise auch die Abrechnungsvoraussetzungen angepasst werden. Derzeit besitzen zahlreiche hausärztliche Leistungen einen persönlichen Arzt-Patienten-Kontakt (APK) im EBM als Abrechnungsvoraussetzung. Der persönliche Arzt-Patienten Kontakt im EBM wird wie folgt definiert: „Ein persönlicher Arzt-Patienten-Kontakt setzt die räumliche und zeitgleiche Anwesenheit von Arzt und Patient und die direkte Interaktion derselben voraus.“ Die über 20 Jahre alte Definition basiert auf einem veralteten Verständnis der medizinischen Leistungserbringung und muss an eine teamorientierte Versorgung angepasst werden. Ein erster Schritt wäre den Arzt-Patienten Kontakt weiter zu fassen, indem keine Bindung an das persönliche ärztliche Fachpersonal hinterlegt wird, sondern auf einen Praxisteam-Kontakt abgezielt wird. Im Zuge einer Anpassung des APKs an zukünftige Entwicklungen sollten Konzepte zur Integration von Kontakten über Künstliche Intelligenz (KI) mitgedacht werden.

## **Berücksichtigung der Entwicklungen von digitalen Tools/Künstliche Intelligenz (KI) im hausärztlichen Sektor**

Im Hinblick auf die zunehmende Relevanz der Patientensteuerung ab dem ersten Kontakt zur Hausarztpraxis, besteht die Notwendigkeit die Definition des Arzt-Patienten-Kontaktes (APK) noch einmal weiter zu fassen. Im APK muss zukünftig auch die Interaktion mit digitalen Tools bzw. KI-Assistenten abgebildet werden. KI-Assistenten können dazu beitragen, allgemeine Gesundheitsfragen zu klären oder Gesundheitsinformationen bereitzustellen sowie die Überwachung von Symptomen oder die Sammlung von Gesundheitsdaten zu unterstützen.

Zunehmend erfolgt über KI-Tools eine Ersteinschätzung zum Gesundheitszustand eines Patienten, dennoch benötigt jede KI-Interaktion auch eine Überwachung durch das Hausarztpraxisteam. Obwohl KI-Tools in vielen Bereichen eine hohe Genauigkeit und Leistung erzielen, ist es wichtig zu beachten, dass sie nicht unfehlbar sind und es keine Garantie gibt, dass die Ergebnisse zu 100% korrekt sind. Das Hausarztpraxisteam muss die Ergebnisse des KI-Tools sorgfältig überprüfen und sicherstellen, dass sie mit den medizinischen Standards und den klinischen Erfahrungen des Hausarztpraxisteam übereinstimmen.

Konkret bedeutet dies, dass auch wenn der Patient selbstständig über die KI z.B. ein Ersteinschätzungsverfahren außerhalb der Sprechzeiten durchläuft und damit zu diesem Zeitpunkt kein Kontakt zum hausärztlichen Personal/ Hausarzt besteht, aber über die Hausarztpraxis bereitgestellt wird, die Ergebnisse und Empfehlungen der KI im Nachgang zum nächstmöglichen Zeitpunkt durch qualifiziertes Personal kritisch bewertet werden. Sofern aus Sicht des Hausarztpraxisteams die KI-Empfehlungen mit den eigenen Einschätzungen zum medizinischen Sachverhalt übereinstimmen, besteht kein Handlungsbedarf und es muss kein Kontakt zum Patienten aufgenommen werden. In diesem Fall existiert der direkte Kontakt räumlich wie zeitlich nur mit der KI, aber nicht mit dem Hausarztpraxisteam. Dennoch wurde der Behandlungsfall im Nachgang verifiziert durch das Hausarztpraxisteam, wodurch zusätzliche Arbeit entstanden ist, die auch einem monetären Ausgleich zugeführt werden sollte. Demnach wäre es zukunftsweisend den Arzt-Patient-Kontakt wie folgt zu erweitern:

„Ein APK beschreibt die Interaktion mit dem qualifizierten Hausarztpraxisteam bzw. deren **KI-gestütztes System** und dem Patienten und/oder dessen Bezugsperson und beinhaltet einen konkreten Bezug zur hausärztlichen Versorgung des Patienten.“

Mittels dieser Definition eines Arzt-Patienten-Kontaktes und der Anwendung des HÄPPI-Delegationskonzeptes, sind die Rahmenbedingungen gegeben, um eine zukunftsgerichtete Versorgung zu ermöglichen.

### Quintessenz zu Delegation:

Die engen Grenzen des Bundesmantelvertrages müssen weiterentwickelt werden, damit eine konsequente Delegation durchführbar ist. Es benötigt zwingend ein neues Delegationskonzept unter ärztlicher Verantwortung. Eine Blaupause für ein umfassendes Delegationskonzept liegt dem HÄPPI-Werk an (siehe vorangestellte Seite).

Die Voraussetzungen zur Vergütung von delegierten Leistungen einer Hausarztpraxis dürfen nicht an dem persönlichen Vorhandensein eines Arztes hängen, sondern sollten abhängig von der Gesamtkompetenz des Praxisteams dazu eingesetzten ärztlichen/nicht ärztlichen Personals betrachtet werden sowie der im HÄPPI etablierten Versorgungsprozesse.

## **Anlage 2: Optimale Zuweisung in die richtige Versorgungsebene durch maximalen Einsatz der zur Verfügung stehenden digitalen Tools/ KI-Anwendungen**

„Zu den typischen Zeitkillern gehöre es, wenn Patienten unzureichend auf den Arztkontakt vorbereitet würden oder Ärzte Tätigkeiten ihrer Angestellten übernehmen. Gleiches gilt für räumliche Beschränkungen oder Probleme mit der EDV.“<sup>16</sup>

Um den Arbeitsablauf in der Praxis zu optimieren und die Effizienz zu steigern, wurde eine Analyse, der häufigsten Verwaltungsaufgaben in einer Hausarztpraxis durchgeführt. Dazu gehören:

- Terminmanagement
- Patientenanmeldung in der Hausarztpraxis (Check-In) und Folgeschritte aus dem Behandlungsanlass (Check-Out)

### **I. Terminmanagement**

Die Terminvergabe im Status Quo findet in der Regel telefonisch oder vor Ort, zunehmend aber auch digital über Online-Terminkalender oder per Mail statt. Grundsätzlich gilt für jede Terminvergabe, das folgende Kriterien bedacht werden sollten:

- Dringlichkeit: Bei der Terminvergabe sollte die Dringlichkeit des Anliegens des Patienten berücksichtigt werden. Patienten mit akuten Beschwerden oder schweren Erkrankungen sollten bevorzugt werden.
- Zeitbedarf: Es ist wichtig, den Zeitbedarf für den jeweiligen Termin richtig einzuschätzen und ausreichend Zeit für die jeweilige Untersuchung oder Behandlung einzuplanen.
- Ressourcen: Die Verfügbarkeit von Ressourcen wie z.B. Untersuchungsgeräten, Räumen oder Fachärzten sollte bei der Terminvergabe berücksichtigt werden.
- Kapazität: Die Kapazität der Praxis und die Auslastung der Ärzte sollten bei der Terminvergabe im Auge behalten werden, um Überlastung und Wartezeiten zu vermeiden.
- Rückrufservice: Wenn keine Termine mehr verfügbar sind, kann ein Rückrufservice angeboten werden, um dem Patienten eine alternative Lösung anzubieten.
- Dokumentation: Es ist wichtig, dass alle Terminvereinbarungen dokumentiert sind, um die Nachverfolgung und Abrechnung zu erleichtern und Doppelbuchungen zu vermeiden.<sup>17</sup>

---

<sup>16</sup> Spiegelberg 2019

<sup>17</sup> Chat GPT; März 2023

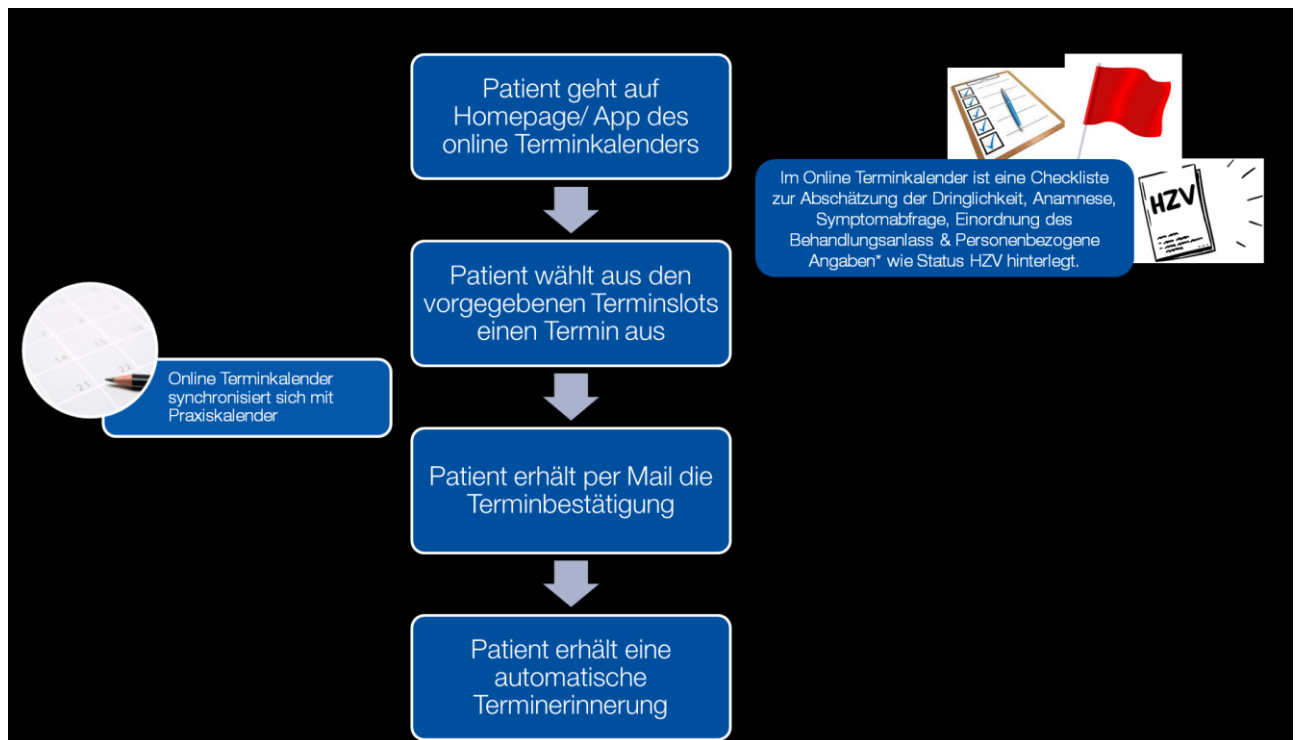

Abbildung 1 (eigene Darstellung)

Um zukünftig die steigende Anzahl an Patienten bei abnehmender Anzahl an Hausärzt:innen zu bewältigen, ist der Einsatz von digitalen Helfern unabwendbar. Bereits heute existieren hilfreiche Tools zur Entlastung des Hausarztpraxisteams. Im Folgenden stellen wir eine Vision zur Prozessoptimierung vor, mit der die zukünftigen Patientenschwemme bewältigt werden könnte.

Die Terminvergabe sollte zukünftig zu einem hohen Anteil ausschließlich digital erfolgen. Dieser Verwaltungsprozess muss aus der Hausarztpraxis herausgehalten werden, damit in der Hausarztpraxis Raum für die medizinische Versorgung bleibt. Das bedeutet, der Patient wählt sich auf der Online-Plattform der gewählten Hausarztpraxis ein. Dort erfolgt für bei unbekannten Patienten folgendes:

In einem ersten Schritt erfolgt eine Triage mit Anamneseerhebung mittels Online-Fragebogen, um den Versorgungsanlass zu identifizieren. Der Online- Fragebogen sollte allgemeine Angaben zur Person erheben, die Teilnahme an Selektivverträgen wie der HZV-Abfrage, Angaben zum aktuellen Behandlungsanlass über die Erhebung der Krankengeschichte des Patienten und einer Abfrage von Red Flags beinhalten.

Für Patienten, die bereits in der Praxis versorgt werden, ist ein registrierter Zugang denkbar, über den die Identifizierung erfolgt, so dass die Erhebung der Angaben zur Person entfallen kann.

Auf der Basis der erhobenen Patientendaten erfolgt automatisiert (Mustererkennung) eine Einschätzung zur Dringlichkeit der Behandlung des Patienten. Auf Basis dessen wird dem Patienten ein Terminvorschlag unterbreitet, der die oben aufgeführten Kriterien wie Zeit, Dringlichkeit, Ressourcenplanung etc. berücksichtigt. Der Termin wird digital durch den Patienten bestätigt, sofern er diesen wahrnehmen kann. Falls eine Ablehnung erfolgt, wird eine Terminmöglichkeit angeboten.

Der bestätigte Termin wird automatisch im Terminkalender der Hausarztpraxis integriert. Die Etablierung einer digitalen Terminerinnerung verringert die Wahrscheinlichkeit einer

Nichtwahrnehmung des Termins durch den Patienten. Zahlreiche Studien deuten an, dass Terminerinnerungen die Anzahl an Terminausfällen reduziert.<sup>18 19</sup>

Kurz:

- ☐ Nutzung eines Self-service Online Terminmanagement
- ☐ Fragebögen zu: 1. Personenbezogene Angaben, 2. HZV-Teilnahme, 3. Anamneseerhebung, 4. Spezifische Symptomabfrage zur Erkennung von Red Flags (Punkt 1 und 2 entfallen bei bereits registrierten Patienten)
- ☐ Termin-Vorschläge für Patient
- ☐ Automatischer Termineintrag im Praxiskalender
- ☐ Automatische Terminerinnerung

Die erhobenen Daten aus der Terminanfrage des Patienten mittels der Fragebögen werden strukturiert in das Arztinformationssystem überführt bzw. sollten auch für weitere denkbare noch zu entwickelnde Diagnostiktools verwendet werden können.

### **Vermeidung von unnötigen Praxiskontakte**

Insbesondere der Bereich der Bagatellerkrankungen birgt Potenzial zur Vermeidung eines Hausarztpraxisbesuches. Damit ist nicht gemeint, dass der Patient mit Bagatellerkrankungen wie z.B. einem milden Verlauf einer Erkältung nicht mehr in der Hausarztpraxis vorstellig wird, sondern dass Patienten mit entsprechenden Angaben zum Behandlungsanlass über den Online-Fragebogen (Ersteinschätzungsverfahren) für die digitale Terminvereinbarung eine patientenfreundliche aufbereitete Informationsvermittlung zum vermuteten Krankheitsbild erhalten. So können die Patienten einschätzen, ob ein Besuch beim Hausarzt notwendig ist oder ob die Beschwerden auch durch Selbstbehandlung oder andere Maßnahmen gelindert werden können. Über diesen Weg kann zum einen die Hausarztpraxis von unnötigen Praxiskontakten entlastet werden und zum anderen die Gesundheitskompetenz des Patienten gestärkt werden.

Gleichzeitig erfolgt über die Dokumentation der Ersteinschätzung eine Rückmeldung an die Hausarztpraxis, so dass diese die Ersteinschätzung überprüfen kann. Sollte das Hausarztpraxisteam zu einer anderen Einschätzung kommen, kann der Patient kontaktiert werden.

## **II. Patientenanmeldung in der Hausarztpraxis (Check-In) und Abmeldung (Check-out)**

Zur Vermeidung von langen Warteschlangen bei der Anmeldung in der Hausarztpraxis, sollte ein self-service Check-In für die Patienten angeboten werden. Patienten können über die Praxis-App/Plattform oder einem Terminal in der Arztpraxis einen digitalen Check-In durchführen. Ein digitales Check-in-Verfahren erfasst die Patientendaten automatisch über die elektronische Gesundheitskarte und verknüpft die Patienteninformationen mit seinem vereinbarten Termin. Das Check-In System prüft die Vollständigkeit der Patientendaten wie Anamnese und weitere relevante vorausgewählte Fragebögen. Sofern die Patientendaten vollständig vorliegen, kann der Patient selbstständig in das Wartezimmer gehen bzw. sofern die Daten unvollständig sind, über das Check-In System befüllen. Das

---

<sup>18</sup> Thomas et al. 2017

<sup>19</sup> Gurol-Urganci I et al. 2013

Check-In System informiert das Hausarztpraxisteam über die Ankunft des Patienten. Es erfolgt dann eine automatische Weiterleitung in den Wartebereich.

Folgend eine Abbildung zum optimalen Prozessablauf beim Check-In:

#### Check-In in der Hausarztpraxis

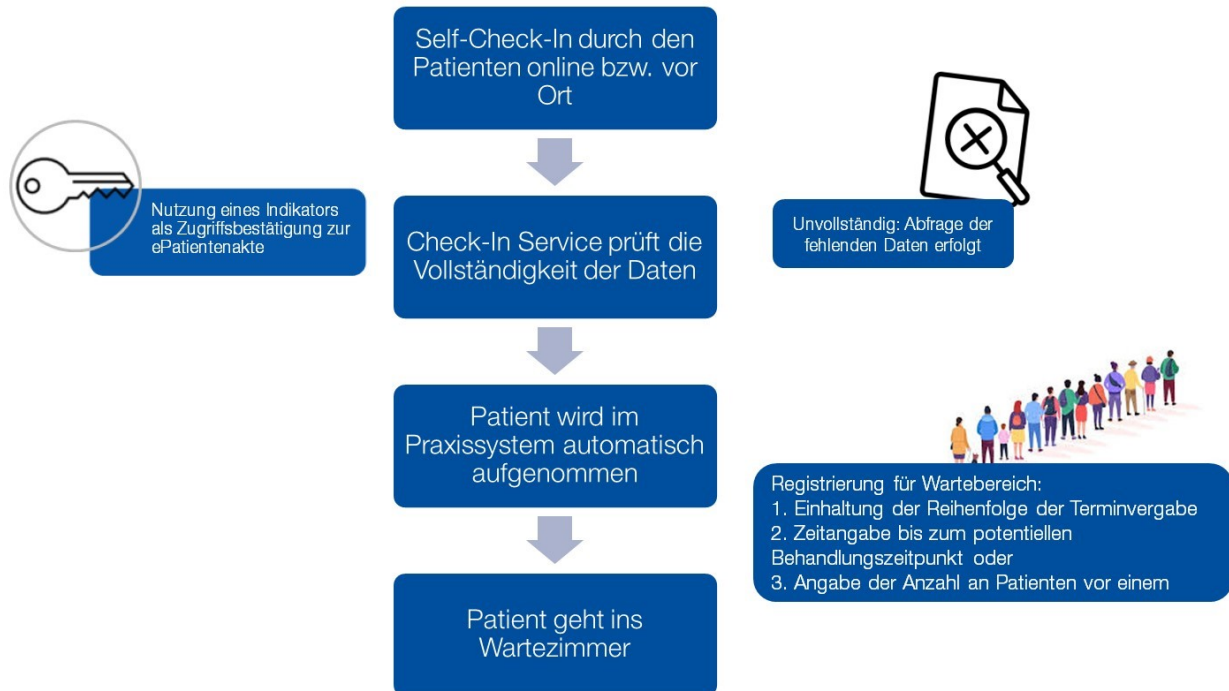

Dies kann den Verwaltungsaufwand für die Praxis verringern und die Genauigkeit der Datenerfassung erhöhen. Es kann auch dazu beitragen, die Wartezeiten in der Praxis zu verkürzen. Durch die bereits vorab durchgeführte Online-Terminvergabe mit integrierter Anamnese-/Triage-Abfrage liegen der Hausarztpraxis auch bereits die ausgefüllten Fragebögen vor, wodurch der Wartestau im Wartezimmer reduziert werden kann.

Der Check-out Bereich stellt einen Empfangsbereich dar, bei denen die Patienten selbstständig vor Verlassen der Hausarztpraxis administrative Tätigkeiten wie den Druck von Formularen z.B. Überweisungen oder auch die Vereinbarung von Terminen oder die Rechnungsbegleichung z.B. von privatärztlichen Leistungen, die das Hausarztpraxisteam für den Patienten digital bereitstellt. Analog zum Self-Check-In, könnten über einen Self-Service-Terminal die entsprechenden Dokumente hinterlegt werden.

## Zusammengefasst:

## Innovationsfaktoren und Zukunftsimpulse des HÄPPI

Im HÄPPI findet eine nach regionalen Bedarfen ausgerichtete zukunftsorientierte hausärztliche Versorgung statt, durch:

- Berücksichtigung von Patient-Reported-Outcomes (PRO)

- Eine interprofessionelle hausärztliche Teamstruktur mit Personen eines nicht-ärztlichen, akademischen Gesundheitsberufes und internen Regelungen zur erfolgreichen Zusammenarbeit
- Die Integration digitaler Konzepte und hybrider Versorgungsmodelle
- Kooperation mit weiteren Akteuren im Gesundheitswesen auf Grundlage verbindlicher Regelungen.

Das Gesundheitswesen steht vor einem enormen Wandel, angetrieben durch technologische Fortschritte, demografische Veränderungen und gesellschaftliche Entwicklungen. In dieser sich rasch verändernden Landschaft sind bestimmte Zukunftsthemen von besonderer Bedeutung, da sie das Potenzial haben, die Art und Weise, wie wir Gesundheit betrachten und die daraus resultierende Rolle und Aufgabe jedes Einzelnen im Gesundheitswesen, grundlegend verändern werden.

Eine der zentralen Entwicklungen ist die fortschreitende Integration von Technologie in die Gesundheitsversorgung. Diese Entwicklung umfasst eine breite Palette von Anwendungen, von Telemedizin über mobile Gesundheitsanwendungen bis hin zur elektronischen Patientenakte. E-Health ermöglicht eine Fernüberwachung von Patienten, die Übermittlung medizinischer Daten in Echtzeit und den Zugang zu medizinischer Beratung unabhängig von geografischen Einschränkungen. Ein weiteres Schlüsselthema ist darüber hinaus die Nutzung von Künstlicher Intelligenz (KI) und maschinellem Lernen. Durch die Analyse großer Datenmengen können Muster erkannt werden, die zur Verbesserung der Diagnosegenauigkeit, personalisierten Behandlungsplänen und medizinischer Forschung genutzt werden. Die Fähigkeit von KI, medizinische Bildgebung zu analysieren und komplexe Daten zu verarbeiten, hat das Potenzial, die medizinische Praxis zu revolutionieren. Hier sind wir als Hausarzt:innen gefragt, die neuen Chancen zu ergreifen und eigenständig die hausärztliche Rolle der Zukunft zu definieren.

Eine aufregende Zukunftschance liegt in der Erhebung der Patient-Reported-Outcomes. Durch die Einbeziehung der Perspektive der Patienten in die Versorgung und Entscheidungsfindung kann die Qualität der medizinischen Betreuung verbessert, die Effektivität von Behandlungen gesteigert und die individuelle Patientenerfahrung positiv beeinflusst werden. Die zunehmende Nutzung von PROs zeigt den Weg in eine patientenzentrierte, evidenzbasierte und maßgeschneiderte Gesundheitsversorgung auf, die die Bedürfnisse und Präferenzen der Patienten in den Mittelpunkt stellt.

Die Einbindung von Innovationen, die Erhöhung der Anpassungsfähigkeit und das Abschließen von Kooperationen zwischen verschiedenen Akteuren im Gesundheitswesen wie auch die interprofessionelle Aufstellung des hausärztlichen Teams sind zukünftige notwendige Maßnahmen, um die bestmögliche Versorgung auch zukünftig gewährleisten zu können.

## Literaturverzeichnis

Chat GPT, abgerufen am 03.03. 2023

Contandriopoulos et al (2018) Analytical typology of multiprofessional primary care models. BMC Fam Pract 19:44

Green LA, Fryer GE Jr, Yawn BP, Lanier D, Dovey SM. The ecology of medical care revisited. N Engl J Med. 2001; 344: 2021-2025

Gurol-Urganci I, de Jongh T, Vodopivec-Jamsek V, Atun R, Car J. Cochrane Database Syst Rev. 2013 Dec 5;2013(12):CD007458.

Karimova et al. (2023): Evaluationsdaten der Hausarztzentrierten Versorgung Baden-Württemberg, Berichtsjahr 2019-2020, Institut für Allgemeinmedizin, Arbeitsbereich Qualitätsförderung und Versorgungsepidemiologie Johan Wolfgang Goethe Universität, Frankfurt am Main, s. Anlage Primärprävention – Querschnittanalyse 2019/20 –

KBV 2022: Statistische Informationen aus dem Bundesarztregister, Bundesgebiet insgesamt Stand: 31.12.2022, [https://www.kbv.de/media/sp/2022-12-31\\_BAR\\_Statistik.pdf](https://www.kbv.de/media/sp/2022-12-31_BAR_Statistik.pdf) , (abgerufen am 14.04.2023)

Munz et al. (2021): Vertragsarztstatistik 2020: Weiblich, angestellt, in Teilzeit, Dtsch Arztebl 2021; 118(17): A-868 / B-722: <https://www.aerzteblatt.de/archiv/218868/Vertragsarztstatistik-2020-Weiblich-angestellt-in-Teilzeit>, (abgerufen 16.05.2023)

Robert-Bosch Stiftung 2021: [https://www.bosch-stiftung.de/sites/default/files/publications/pdf/2021-05/Studie\\_Primaerversorgung\\_Gesundheitszentren-fuer-Deutschland.pdf](https://www.bosch-stiftung.de/sites/default/files/publications/pdf/2021-05/Studie_Primaerversorgung_Gesundheitszentren-fuer-Deutschland.pdf) (abgerufen am 20.07.2023)

Sachverständigenrat zur Begutachtung der Entwicklung im Gesundheitswesen: Sondergutachten 2009 und 2018: <http://www.svr-gesundheit.de> (abgerufen am 10.02.2023)

Schaeffer et al (2016): Gesundheitskompetenz der Bevölkerung in Deutschland: Ergebnisbericht. Bielefeld: Universität Bielefeld, Fakultät für Gesundheitswissenschaften

Steinbeck et al. BERTELSMANN STIFTUNG (HRSG.) (2021): Patient-Reported Outcome Measures (PROMs): ein internationaler Vergleich; Herausforderungen und Erfolgsstrategien für die Umsetzung von PROMs in Deutschland

Spiegelberg (2019): Effektives Terminmanagement: Mehr Zeit durch gute Planung; Dtsch Arztebl 2019; 116(5): A-222 / B-186 / C-186; <https://www.aerzteblatt.de/archiv/205088/Effektives-Terminmanagement-Mehr-Zeit-durch-gute-Planung> (abgerufen am 17.07.2023)

Thomas et al. (2017): Psychiatr Serv. 2017 Jan 1;68(1):75-80. doi: 10.1176/appi.ps.201500514. Epub 2016 Sep 1. PMID: 27582239 Clinical Trial.

Wensing, J. Szecsenyi et al (2019): Nature SCIENTIFIC REPORTS 2019 Strong primary care and patients' survival, M., 9:10859 | (abgerufen 30.06.2023)

WHO (2019): Ziele für nachhaltige Entwicklung, Bericht 2019:  
<https://www.un.org/depts/german/millennium/SDG%20Bericht%202019.pdf>; (abgerufen 20.04.2023)

Deutscher Hausärzteverband Landesverband Baden-Württemberg e. V.

Kölner Straße 18 · 70376 Stuttgart

hausarzt-bw.de

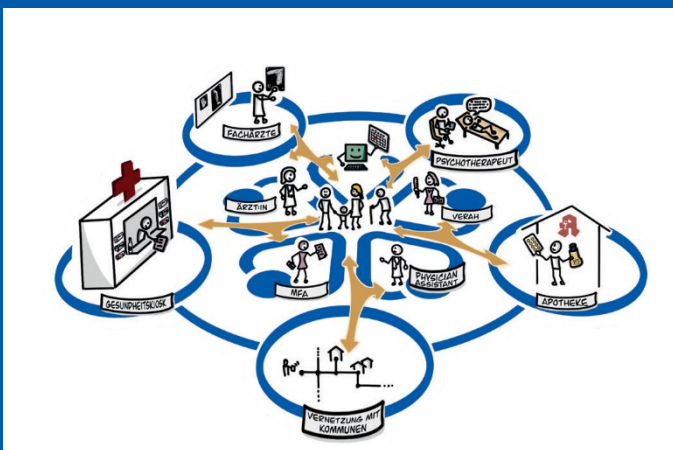

Supplement: MOESM2 [file 26666504]
