# Supplementary material for: HÄPPI – Konzeption eines Modells für die ambulante Versorgung in Deutschland
Source: Springer Nature journal article supplement (doi:10.1007/s44266-023-00161-w), 2024-01-26
Supplement: MOESM1 [file 26666504]

## Entwicklung eines Interprofessionell Primärversorgenden Hausärztlichen Zentrums (HÄPPI)

Datum/#:

### INTERVIEWLEITFADEN EINZELINTERVIEWS

??? Welche Stärken, Schwächen, Risiken und Möglichkeiten liegen in der interprofessionellen Primärversorgung und wie kann diesen bei der Entwicklung eines HÄPPI begegnet werden?

Si:

- 1) Damit Sie wissen, wer wir sind, würden wir uns kurz vorstellen 😊
- 2) Aufklärung erfolgt und Einverständniserklärung unterschrieben?
- 3) Interviewdurchführung

Kurz noch eine Information zur Durchführung des Interviews: wir werden relativ offene Fragen basierend auf einem von für diese Befragung entwickelten Leitfaden stellen. Alles, was Sie berichten kann für uns von Nutzen sein, das heißt, antworten Sie gerne frei heraus das, was Ihnen in den Sinn kommt.

- 4) Wenn das Band läuft, muss ich formal nochmal zwei Sätze vorlesen. Dann würden wir mit der Interviewaufnahme beginnen:

| Thema                                          | Frage                                                                                                                                                                                                                                                                                                                                                                                                                                                                                                                                                                                                                                                                            | Zeit                  |
|------------------------------------------------|----------------------------------------------------------------------------------------------------------------------------------------------------------------------------------------------------------------------------------------------------------------------------------------------------------------------------------------------------------------------------------------------------------------------------------------------------------------------------------------------------------------------------------------------------------------------------------------------------------------------------------------------------------------------------------|-----------------------|
| Einverständnis                                 | Vielen Dank für Ihre Bereitschaft zur Teilnahme an diesem Interview. Die Aufnahme dient lediglich der Speicherung aller Aussagen und wird nach Abschluss der Auswertung gelöscht. Die Auswertung erfolgt basierend auf den pseudonymisierten Transkripten. Dritte haben keinen Zugriff auf die Aufzeichnungen. Für die Aufnahme möchte ich nochmal sicherstellen, dass Sie die Informationsschrift erhalten haben, alle Ihre Fragen zur Durchführung der Studie beantwortet sind und Sie der Video- und Tonaufnahme des Interviews zustimmen. Bitte antworten Sie mit Ja oder Nein.                                                                                              | 1 min<br><b>START</b> |
| <b>Einstieg / Vorerfahrung</b><br><i>Simon</i> | Im HÄPPI sollen Patient*innen interprofessionell versorgt werden.<br><b>Was für Erfahrungen haben Sie mit interprofessioneller Versorgung gemacht?</b> <ul style="list-style-type: none"> <li>• Geben Sie gerne ein Beispiel</li> <li>• Ggf. Was verstehen Sie unter interprofessioneller Versorgung?</li> </ul>                                                                                                                                                                                                                                                                                                                                                                 | 4 Min                 |
| <b>1. Möglichkeiten</b><br><i>Johanna</i>      | Eine Möglichkeit Interprofessionelle Versorgung umzusetzen, ist die Behandlung in einem <b>Betreu-Team</b> .<br>Was denken Sie aus Ihrer beruflichen Perspektive –<br><b>Welche Vorteile hat ein Betreu-Team für die Patientenversorgung?</b><br>Def: In einem Betreu-Team erbringen verschiedene Berufsgruppen gemeinsam eine Leistung an Patient*innen (bspw. Wundversorgung) entsprechend Ihrer Kompetenz in Abwägung des Ressourceneinsatzes. <ul style="list-style-type: none"> <li>• Beschreiben Sie bitte die Stärken und Chancen eines Betreu-Teams anhand eines Beispiels.</li> <li>• In welchem Szenario wäre die Versorgung in einem Betreu-Team sinnvoll?</li> </ul> | 5 Min                 |
| <b>2. Herausforderungen</b><br><i>Simon</i>    | Und nun die Kehrseite –                                                                                                                                                                                                                                                                                                                                                                                                                                                                                                                                                                                                                                                          | 5 Min                 |

|                                                                                            |                                                                                                                                                                                                                                                                                                                                                                                                                                                                                                                                               |                                                 |
|--------------------------------------------------------------------------------------------|-----------------------------------------------------------------------------------------------------------------------------------------------------------------------------------------------------------------------------------------------------------------------------------------------------------------------------------------------------------------------------------------------------------------------------------------------------------------------------------------------------------------------------------------------|-------------------------------------------------|
|                                                                                            | <p>Welche Herausforderungen sehen Sie in der interprofessionellen Patientenversorgung im Betreu-Team?</p> <ul style="list-style-type: none"> <li>• In welcher Situation könnten durch die Versorgung im Betreu-Team Risiken entstehen?</li> <li>• Was sind mögliche Schwächen der Versorgung im Betreu-Team? (Beispiel?)</li> <li>• Ggf. Zusammenstellung des Betreu-Teams?</li> <li>• Ggf. Leitung des Betreu-Teams?</li> </ul> <p>Hätten Sie spontan darauf schon Lösungsvorschläge?</p>                                                    |                                                 |
| <p><b>3. Verteilung von Aufgaben</b><br/><i>Johanna</i></p>                                | <p>Kommen wir jetzt zur konkreten Umsetzung:<br/><b>Wie kann so ein Betreu-Team sinnvollerweise organisiert werden?</b></p> <ul style="list-style-type: none"> <li>• <b>Welche Aufgaben und Verantwortungen könnte Ihre Berufsgruppe in einem Häppi-Konstrukt übernehmen?</b><br/>Sekretariat, MFA, VERAH, Pflege, Akad. VERAH / PA / Pflege, Ärztin, andere?</li> </ul>                                                                                                                                                                      | <p>5-10<br/>Min<br/>ZEIT?<br/>(max.<br/>25)</p> |
| <p><b>4. Organisation / Strukturen für Zusammenarbeit / Austausch</b><br/><i>Simon</i></p> | <p>Welche Strukturen sind notwendig, dass ein Betreu Team effizient zusammenarbeitet? Wie müssen diese implementiert werden?</p> <ul style="list-style-type: none"> <li>• Ggf. Kommunikationsstruktur wie Meetings oder Pat-Akte</li> </ul> <p>Wo und wie kann Digitalisierung zeitnah und gewinnbringend eingesetzt werden?</p> <ul style="list-style-type: none"> <li>• Hinsichtlich Terminkalender? Self-checkin der Patient*innen?</li> </ul>                                                                                             | <p>5-10<br/>Min</p>                             |
| <p><b>5. Einbindung von Patient*innen</b><br/><i>Johanna</i></p>                           | <p>Und jetzt nochmal aus der Perspektive der Patient*innen:</p> <ul style="list-style-type: none"> <li>• Wie kann eine Patientenzentrierung sichergestellt werden?</li> <li>• Was denken Sie, an welchen Stellen sollten Patient*innen integriert werden und wie könnte die Integration aussehen?</li> <li>• Welche Ideen fallen Ihnen ein, wie man durch ein HÄPPI die Gesundheitskompetenz von Patient*innen stärken könnte? <ul style="list-style-type: none"> <li>○ Ggf. Patient*innen als Betroffene integrieren?</li> </ul> </li> </ul> | <p>5-10<br/>Min</p>                             |
| <p><b>6. Kooperation</b><br/><i>Simon</i></p>                                              | <p>Es können nicht alle Leistungen unmittelbar im HÄPPI angeboten werden</p> <p>Welche externen Kooperationen wären sinnvoll?<br/>Welche davon sollten dringend organisiert werden?</p>                                                                                                                                                                                                                                                                                                                                                       | <p>5 Min</p>                                    |
| <p><b>Abschluss</b><br/><i>Johanna</i></p>                                                 | <p>Vielen Dank für Ihre Unterstützung bei der Ausarbeitung des HÄPPI Konzeptes. Was würden Sie abschließend sagen,<br/><b>Was sind die Vorteile eines Hausärztlichen Versorgungszentrums (HÄPPI) im Vergleich zu einer hausärztlichen Praxis oder einem MVZ?</b></p>                                                                                                                                                                                                                                                                          | <p>5 Min</p>                                    |
|                                                                                            | <p>Haben wir etwas vergessen?<br/>Dann würden wir die Interviewaufnahme beenden, Herzlichen Dank!</p>                                                                                                                                                                                                                                                                                                                                                                                                                                         |                                                 |

*Simon:* Zum Schluss bitten wir Sie um folgende soziodemografische Angaben:

|                                                              |  |
|--------------------------------------------------------------|--|
| Gesundheitsberuf / Profession                                |  |
| Persönliche Erfahrung in der ambulanten Versorgung in Jahren |  |
| Arbeitsumfeld / Tätigkeit                                    |  |
| Kompetitive Interessen / weitere Tätigkeiten (Verband o.ä.)? |  |
